# Supplementary material for: Pulsed Field Ablation Versus Radiofrequency Ablation: Esophageal Injury in a Novel Porcine Model
Source: PubMed Central journal article supplement — Circ Arrhythm Electrophysiol. 2020 Jan 24;13(3):e008303. doi: 10.1161/CIRCEP.119.008303 (PMC7069397; doi:10.1161/circep.119.008303), 2020-01-24
Supplement: hae-13-e008303-s001.pdf [file hae-13-e008303-s001.pdf]

## SUPPLEMENTAL MATERIAL

Supplemental Figure 1

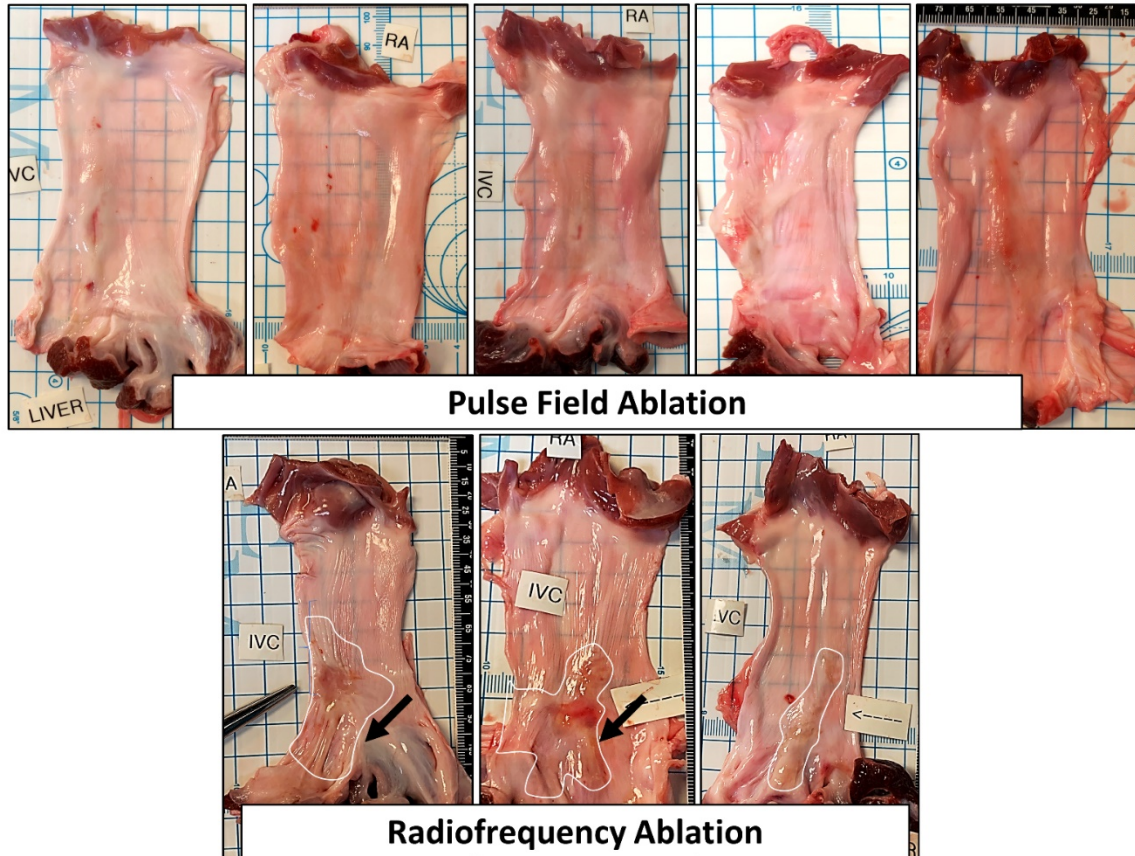

**Top panel:** Inferior vena cava from the PFA group: Gross examination, revealed no areas of scarring and the luminal surface was smooth and even. **Bottom panel:** Inferior vena cava from the RF group. Excluding the one animal with the fistula, the other three swine demonstrated prominent areas of thickening and discoloration on the luminal aspect of the IVC with areas of scarring in two swine.

---

### **Additional Disclosures**

Vivek Reddy's disclosures with medical companies include: Abbott (Consultant), Ablacon (Consultant, Equity), Acutus Medical (Consultant, Equity), Affera (Consultant, Equity), Apama Medical (Consultant, Equity), Aquaheart (Consultant, Equity), Atacor (Consultant, Equity), Autonomix (Consultant, Equity), Axon (Consultant), Backbeat (Consultant, Equity), BioSig (Consultant, Equity), Biosense-Webster (Consultant), Biotronik (Consultant), Boston Scientific (Consultant), Cardiofocus (Consultant), Cardionomic (Consultant), CardioNXT / AFTx (Consultant), Circa Scientific (Consultant, Equity), Corvia Medical (Consultant, Equity), East End Medical (Consultant, Equity), EBR (Consultant), EPD (Consultant, Equity), Epix Therapeutics (Consultant, Equity), EpiEP (Consultant, Equity), Eximo (Consultant, Equity), Farapulse (Consultant, Equity), Fire1 (Consultant, Equity), Impulse Dynamics (Consultant), Javelin (Consultant, Equity), Keystone Heart (Consultant, Equity), LuxCath (Consultant, Equity), Manual Surgical Sciences (Equity), Medlumics (Consultant, Equity), Medtronic (Consultant), Middlepeak (Consultant, Equity), Newpace (Equity), Nuvera (Consultant, Equity), Philips (Consultant), Sirona Medical (Consultant, Equity), Stimda (Consultant), Surecor (Equity), Thermedical (Consultant), Valcare (Consultant, Equity), Vizara (Equity) and VytronUS (Consultant, Equity).

### **Additional Disclosures**

Jacob Koruth

Consultant- Abbott, Vytronus, Cardiofocus

Research grants- Vytronus, Cardiofocus, Luxcath, Biosense Webster. Affera
